# Supplementary material for: Translational Modeling Identifies Synergy between Nanoparticle-Delivered miRNA-22 and Standard-of-Care Drugs in Triple-Negative Breast Cancer
Source: PubMed Central journal article supplement (PMC8986735; doi:10.1007/s11095-022-03176-3), 2022-03-16

## **Supplementary Information**

### **Translational Modeling Identifies Synergism between Nanoparticle-Delivered miRNA-22 and Standard-of-Care Drugs in Triple-Negative Breast Cancer**

**Prashant Dogra, Javier Ruiz Ramírez, Joseph D. Butner, Maria J. Peláez, Caroline Chung, Anupama Hooda-Nehra, Renata Pasqualini, Wadih Arap, Vittorio Cristini, George A. Calin, Bulent Ozpolat, Zhihui Wang\***

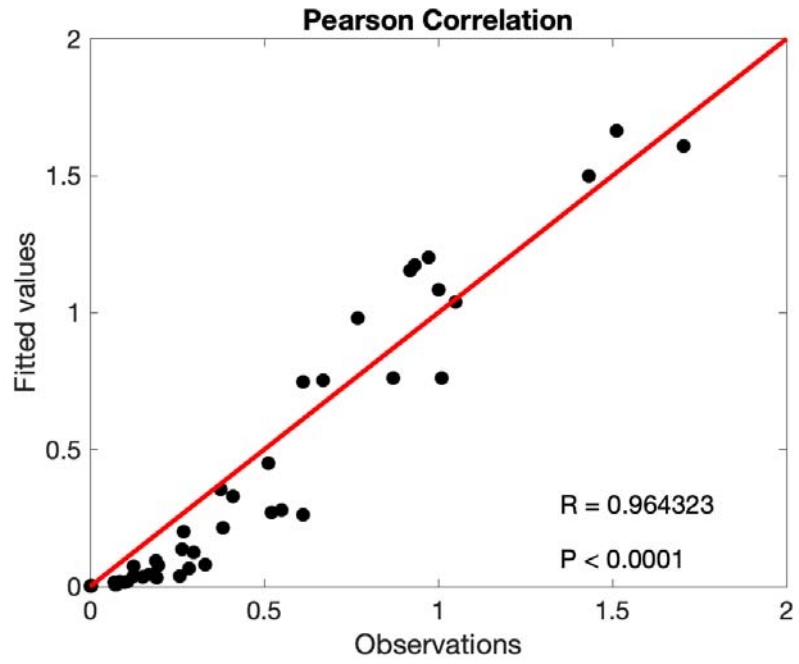

**Figure S1.** Pearson correlation of model fits to *in vivo* data shown in Figure 2.

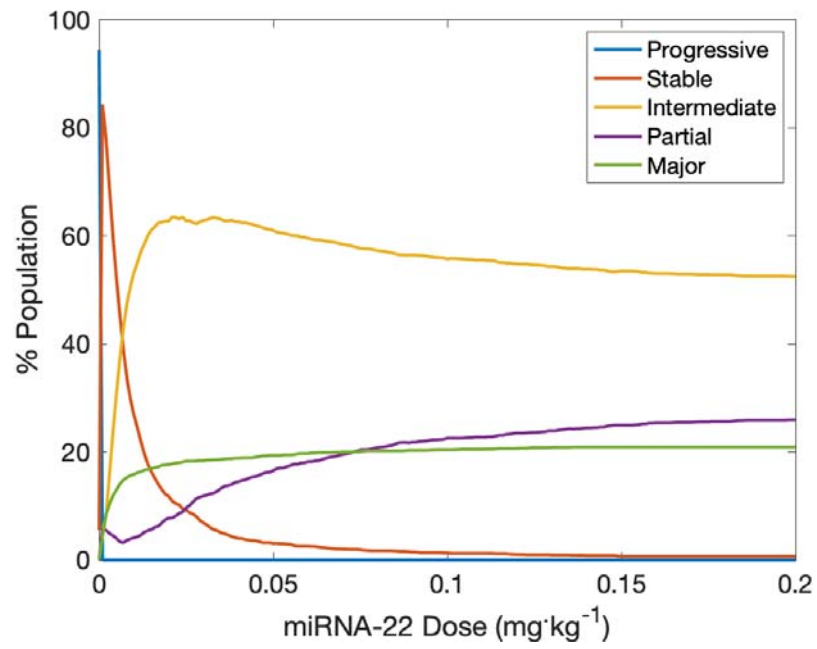

**Figure S2.** Population-scale dose-response relationship of miRNA-22 therapy.

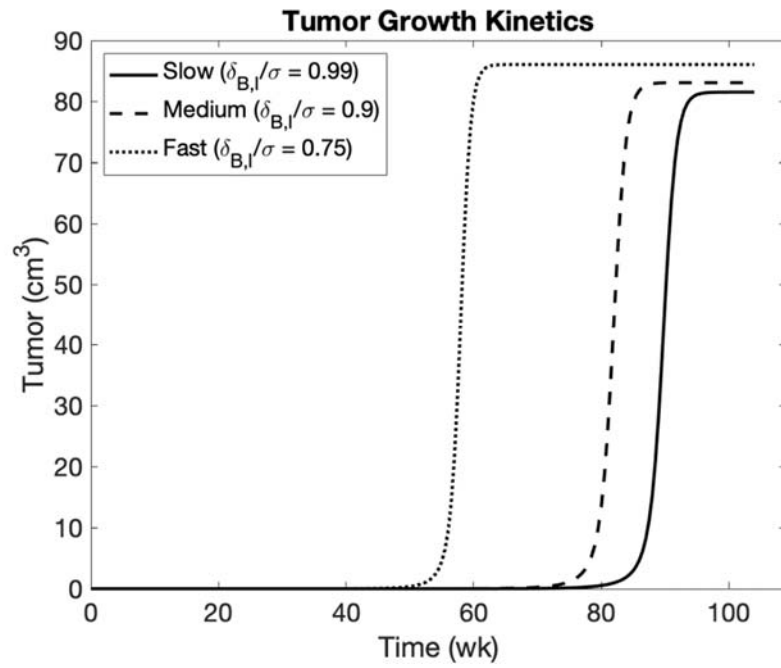

**Figure S3.** Tumor growth kinetics of slow-, medium-, and fast-growing tumors under the control conditions.

# CompuSyn Report

**Experiment Name:** AAPS paper  
**Date:** 7/14/21  
**File Name:** C:\Users\prash\Desktop\report.cse  
**Description**

**Drug:** mirna22 (mirna) [mg/kg]  
**Drug:** dox (dox) [mg/kg]  
**Drug:** ate (ate) [mg/kg]  
**Drug Combo:** mirna+dox (mirdox) (mirna+dox)  
**Drug Combo:** mirna+ate (mirate) (mirna+ate)  
**Drug Combo:** mirnadoxate (mda) (mirna+dox+ate)

---

Data for Drug: mima [mg/kg]

| Dose   | Effect |
|--------|--------|
| 0.01   | 0.2017 |
| 0.0311 | 0.3087 |
| 0.0522 | 0.3466 |
| 0.0733 | 0.3662 |
| 0.0944 | 0.3782 |
| 0.1156 | 0.3864 |
| 0.1367 | 0.3922 |
| 0.1578 | 0.3966 |
| 0.1789 | 0.4001 |
| 0.2    | 0.4029 |

10 data points entered.

**X-int:** -0.2695

**Y-int:** 0.08429 +/- 0.03407

**m:** 0.31277 +/- 0.02925

**Dm:** 0.53764

**r:** 0.96676

---

Data for Drug: dox [mg/kg]

| Dose | Effect |
|------|--------|
| 0.01 | 0.0012 |
| 1.12 | 0.0589 |
| 2.23 | 0.087  |
| 3.34 | 0.1068 |
| 4.45 | 0.1225 |
| 5.56 | 0.1352 |
| 6.67 | 0.146  |
| 7.78 | 0.1553 |
| 8.89 | 0.1635 |

**Dose Effect**

10.0 0.1708

10 data points entered.

**X-int:** 1.81569**Y-int:** -1.3608 +/- 0.02420**m:** 0.74946 +/- 0.02588**Dm:** 65.4173**r:** 0.99526

## Data for Drug: ate [mg/kg]

**Dose Effect**

0.01 0.08402

1.12 0.08454

2.23 0.08454

3.34 0.08455

4.45 0.08455

5.56 0.08455

6.67 0.08455

7.78 0.08455

8.89 0.08455

10.0 0.08455

10 data points entered.

**X-int:** 1033.99**Y-int:** -1.0352 +/- 1.13E-4**m:** 0.00100 +/- 1.20E-4**Dm:** Infinit**r:** 0.94670

## Data for Non-Constant Combo: mirdox (mirna+dox)

**Dose mirna Dose dox Effect**

0.01 0.01 0.2064

0.0311 1.12 0.5982

0.0522 2.23 0.7995

0.0733 3.34 0.8892

0.0944 4.45 0.9291

0.1156 5.56 0.9493

0.1367 6.67 0.9609

0.1578 7.78 0.9683

0.1789 8.89 0.9733

0.2 10.0 0.9769

10 data points entered.

## Data for Non-Constant Combo: mirate (mirna+ate)

**Dose mirna Dose ate Effect**

0.01 0.01 0.32318

| Dose mirna | Dose ate | Effect  |
|------------|----------|---------|
| 0.0311     | 1.12     | 0.44847 |
| 0.0522     | 2.23     | 0.49304 |
| 0.0733     | 3.34     | 0.51610 |
| 0.0944     | 4.45     | 0.53018 |
| 0.1156     | 5.56     | 0.53967 |
| 0.1367     | 6.67     | 0.54648 |
| 0.1578     | 7.78     | 0.55162 |
| 0.1789     | 8.89     | 0.55563 |
| 0.2        | 10.0     | 0.55885 |

10 data points entered.

Data for Non-Constant Combo: mda (mirna+dox+ate)

| Dose mirna | Dose dox | Dose ate | Effect  |
|------------|----------|----------|---------|
| 0.01       | 0.01     | 0.01     | 0.32890 |
| 0.0311     | 1.12     | 1.12     | 0.83052 |
| 0.0522     | 2.23     | 2.23     | 0.95271 |
| 0.0733     | 3.34     | 3.34     | 0.97687 |
| 0.0944     | 4.45     | 4.45     | 0.98529 |
| 0.1156     | 5.56     | 5.56     | 0.98933 |
| 0.1367     | 6.67     | 6.67     | 0.99164 |
| 0.1578     | 7.78     | 7.78     | 0.99312 |
| 0.1789     | 8.89     | 8.89     | 0.99414 |
| 0.2        | 10.0     | 10.0     | 0.99488 |

10 data points entered.

### Median-Effect Plot for Drugs

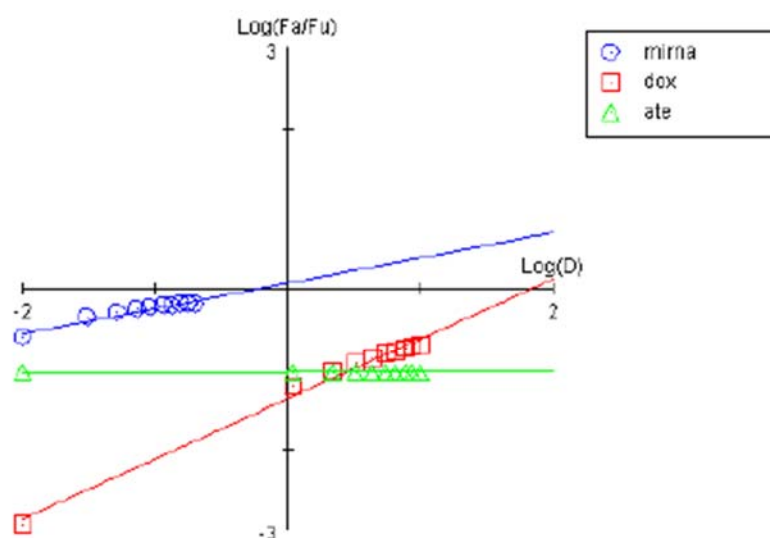

## Median-Effect Plot for Drug Combos

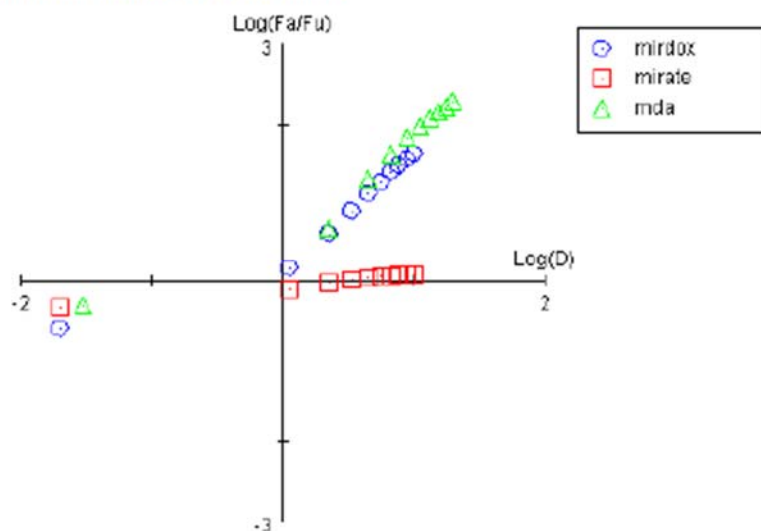

## CI Data for Non-Constant Combo: mirdox (mima+dox)

| Dose mirna | Dose dox | Effect | CI      |
|------------|----------|--------|---------|
| 0.01       | 0.01     | 0.2064 | 1.37989 |
| 0.0311     | 1.12     | 0.5982 | 0.02627 |
| 0.0522     | 2.23     | 0.7995 | 0.00655 |
| 0.0733     | 3.34     | 0.8892 | 0.00335 |
| 0.0944     | 4.45     | 0.9291 | 0.00224 |
| 0.1156     | 5.56     | 0.9493 | 0.00172 |
| 0.1367     | 6.67     | 0.9609 | 0.00143 |
| 0.1578     | 7.78     | 0.9683 | 0.00125 |
| 0.1789     | 8.89     | 0.9733 | 0.00112 |
| 0.2        | 10.0     | 0.9769 | 0.00104 |

## CI Data for Non-Constant Combo: mirate (mirna+ate)

| Dose mirna | Dose ate | Effect  | CI      |
|------------|----------|---------|---------|
| 0.01       | 0.01     | 0.32318 | 0.19766 |
| 0.0311     | 1.12     | 0.44847 | 0.11207 |
| 0.0522     | 2.23     | 0.49304 | 0.10613 |
| 0.0733     | 3.34     | 0.51610 | 0.11095 |
| 0.0944     | 4.45     | 0.53018 | 0.11930 |
| 0.1156     | 5.56     | 0.53967 | 0.12933 |
| 0.1367     | 6.67     | 0.54648 | 0.14007 |
| 0.1578     | 7.78     | 0.55162 | 0.15131 |
| 0.1789     | 8.89     | 0.55563 | 0.16287 |
| 0.2        | 10.0     | 0.55885 | 0.17465 |

## CI Data for Non-Constant Combo: mda (mirna+dox+ate)



| Dose mirna | Dose dox | Dose ate | Effect  | CI      |
|------------|----------|----------|---------|---------|
| 0.01       | 0.01     | 0.01     | 0.32890 | 0.18226 |
| 0.0311     | 1.12     | 1.12     | 0.83052 | 0.00241 |
| 0.0522     | 2.23     | 2.23     | 0.95271 | 6.27E-4 |
| 0.0733     | 3.34     | 3.34     | 0.97687 | 3.47E-4 |
| 0.0944     | 4.45     | 4.45     | 0.98529 | 2.49E-4 |
| 0.1156     | 5.56     | 5.56     | 0.98933 | 2.02E-4 |
| 0.1367     | 6.67     | 6.67     | 0.99164 | 1.74E-4 |
| 0.1578     | 7.78     | 7.78     | 0.99312 | 1.56E-4 |
| 0.1789     | 8.89     | 8.89     | 0.99414 | 1.44E-4 |
| 0.2        | 10.0     | 10.0     | 0.99488 | 1.35E-4 |

Combination Index Plot

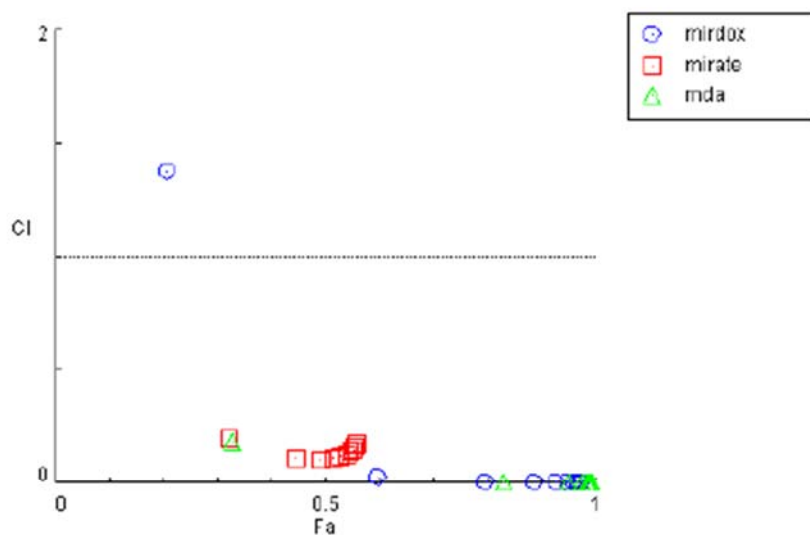

Supplement: 11095_2022_3176_MOESM1_ESM.pdf [file 11095_2022_3176_MOESM1_ESM.pdf]
